# Supplementary material
Source: ML conference proceedings conference paper supplement (https://proceedings.mlr.press/v70/fahandar17a.html)
Supplement: Supplementary file [file fahandar17a-supp.pdf]

Supplementary Material for  
“Statistical Inference for Incomplete Ranking Data:  
The Case of Rank-Dependent Coarsening”

# 1 Proofs of Theoretical Results in Section 7

**Definition 1.** Let  $\hat{\pi}_N$  denote the ranking produced as a prediction by a ranking method on the basis of  $N$  observed (pairwise) preferences. The method is consistent if  $\mathbf{p}(\hat{\pi}_N = \pi^*) \rightarrow 1$  for  $N \rightarrow \infty$ .

**Definition 2.** Consider a complete ranking  $\pi \in \mathbb{S}_K$ , and let us consider two indices  $i \neq j$ . We define the  $(i, j)$ -swap ranking,  $\pi_{i,j} : [K] \rightarrow [K]$ , as follows:  $\pi_{i,j}(k) = \pi(k)$ ,  $\forall k \in [K] \setminus \{i, j\}$ ,  $\pi_{i,j}(i) = \pi(j)$  and  $\pi_{i,j}(j) = \pi(i)$ .

**Lemma 3.** (Lemma 2 in the paper) Let us consider a probability measure  $\mathbf{p}_\theta$  over  $\mathbb{S}_K$ . Consider  $q_{i,j} = \sum_{\pi \in E(a_i \succ a_j)} \mathbf{p}_\theta(\pi) \lambda_{\pi(i), \pi(j)}$ ,  $\forall i \neq j$ . (The model (8) in the paper, without assuming that the marginal distribution is necessarily PL). Then:

$$\mathbf{p}_\theta(\pi) \geq \mathbf{p}_\theta(\pi_{i,j}), \forall \pi \in E(a_i \succ a_j) \Rightarrow q_{i,j} > q_{j,i}.$$

*Proof.* We easily observe that:

$$q_{i,j} = \sum_{\pi \in E(a_i \succ a_j)} \mathbf{p}_\theta(\pi) \lambda_{\pi(i), \pi(j)}$$

$$q_{j,i} = \sum_{\pi \in E(a_j \succ a_i)} \mathbf{p}_\theta(\pi) \lambda_{\pi(j), \pi(i)}$$

Furthermore, let us notice that the set  $E(a_j \succ a_i)$  coincides with  $\{\pi_{i,j} : \pi \in E(a_i \succ a_j)\}$  and that  $\lambda_{\pi_{i,j}(i), \pi_{i,j}(j)} = \lambda_{\pi(j), \pi(i)}$  for every  $\pi \in E(a_i \succ a_j)$ . Therefore, we can write:

$$q_{j,i} = \sum_{\pi \in E(a_i \succ a_j)} \mathbf{p}_\theta(\pi_{i,j}) \lambda_{\pi(i), \pi(j)}.$$

By hypothesis, the following inequalities hold:

$$\mathbf{p}_\theta(\pi) \geq \mathbf{p}_\theta(\pi_{i,j}), \forall \pi \in E(a_i \succ a_j),$$

and therefore we deduce that  $q_{i,j} > q_{j,i}$ .

**Lemma 4.** Consider the PL model with  $\theta_i > 0$  for all  $i \in [K]$ , and let  $\lambda = \{\lambda_{u,v} \mid 1 \leq u < v \leq K\}$  be any (pairwise) coarsening such that  $\lambda_{u,v}$  is the probability to select positions  $u$  and  $v$ . Then,  $q_{i,j} > 0$  for all  $i, j \in [K]$ ,  $i \neq j$ . Thus, each preference  $a_i \succ a_j$  has a positive probability to be observed.

*Proof.* Take any  $\lambda_{u,v} > 0$  and fix  $i, j \in [K]$ ,  $i \neq j$ . According to the PL model, if  $\theta_k > 0$  for all  $k \in [K]$ ,  $\mathbf{pl}_\theta(\pi) > 0$  for all  $\pi \in \mathbb{S}_K$ . Thus, there is a probability  $p > 0$  that  $\pi(i) = u$  and  $\pi(j) = v$ . Consequently,  $q_{i,j} \geq p \lambda_{u,v} > 0$ .

**Lemma 5.** (Lemma 3 in the paper) Assume the model (8) and let  $\theta_i > 0$  for all  $i \in [K]$ ,  $\theta_i \neq \theta_j$  for  $i \neq j$ . The coarsening (7) is order-preserving for PL in the sense that  $p_{i,j} > 1/2$  if and only if  $q'_{i,j} > 1/2$ , where  $q'_{i,j} = q_{i,j} / (q_{i,j} + q_{j,i})$ .

*Proof.* First, note that, according to the previous lemma,  $q_{i,j} > 0$  for all  $i, j \in [K]$ ,  $i \neq j$ , so all  $q'_{i,j}$  are well defined.

- Let us first prove the “only if” part. According to Lemma 3, it only remains to prove that any Plackett-Luce distribution  $\mathbf{pl}_\theta$  satisfies the following implication:

$$p_{i,j} > p_{j,i} \Rightarrow \mathbf{pl}_\theta(\pi) \geq \mathbf{pl}_\theta(\pi_{i,j}), \quad \forall \pi \in E(a_i \succ a_j).$$

Let us first notice that  $p_{i,j} > p_{j,i}$  if and only if  $\theta_i > \theta_j$ . Let us take an arbitrary ranking  $\pi \in E(a_i \succ a_j)$ . We can write:

$$\begin{aligned} \mathbf{pl}_\theta(\pi) &= C_{i,j} \cdot \frac{\theta_{\pi^{-1}(\pi(i))}}{\sum_{s=\pi(i)}^{\pi(K)} \theta_{\pi^{-1}(s)}} \cdot \frac{\theta_{\pi^{-1}(\pi(j))}}{\sum_{s=\pi(j)}^{\pi(K)} \theta_{\pi^{-1}(s)}} \\ \mathbf{pl}_\theta(\pi_{i,j}) &= C_{i,j} \cdot \frac{\theta_{\pi_{i,j}^{-1}(\pi_{i,j}(i))}}{\sum_{s=\pi_{i,j}(i)}^{\pi_{i,j}(K)} \theta_{\pi_{i,j}^{-1}(s)}} \cdot \frac{\theta_{\pi_{i,j}^{-1}(\pi_{i,j}(j))}}{\sum_{s=\pi_{i,j}(j)}^{\pi_{i,j}(K)} \theta_{\pi_{i,j}^{-1}(s)}}, \end{aligned}$$

where

$$\begin{aligned} C_{i,j} &= \prod_{r \notin \{\pi(i), \pi(j)\}} \frac{\theta_{\pi^{-1}(r)}}{\theta_{\pi^{-1}(r)} + \theta_{\pi^{-1}(r+1)} + \dots + \theta_{\pi^{-1}(K)}} \\ &= \prod_{r \notin \{\pi_{i,j}(i), \pi_{i,j}(j)\}} \frac{\theta_{\pi_{i,j}^{-1}(r)}}{\theta_{\pi_{i,j}^{-1}(r)} + \theta_{\pi_{i,j}^{-1}(r+1)} + \dots + \theta_{\pi_{i,j}^{-1}(K)}}. \end{aligned}$$

According to the relation between  $\pi$  and  $\pi_{i,j}$ , we can easily check the following equality:

$$\sum_{s=\pi(i)}^{\pi(K)} \theta_{\pi^{-1}(s)} = \sum_{s=\pi_{i,j}(j)}^{\pi_{i,j}(K)} \theta_{\pi_{i,j}^{-1}(s)}$$

(In fact, both  $\theta_i$  and  $\theta_j$  appear in both sums). Furthermore, we observe that:

$$\sum_{s=\pi(j)}^{\pi(K)} \theta_{\pi^{-1}(s)} - \sum_{s=\pi_{i,j}(i)}^{\pi_{i,j}(K)} \theta_{\pi_{i,j}^{-1}(s)} = \theta_j - \theta_i,$$

and therefore

$$\sum_{s=\pi(j)}^{\pi(K)} \theta_{\pi^{-1}(s)} < \sum_{s=\pi_{i,j}(i)}^{\pi_{i,j}(K)} \theta_{\pi_{i,j}^{-1}(s)}.$$

We deduce that  $\mathbf{pl}_\theta(\pi) > \mathbf{pl}_\theta(\pi_{i,j})$ .

- Let us now prove the “if” part. Suppose that  $q'_{i,j} > 1/2$ . Therefore, according to the “only if part”,  $p_{i,j}$  must be greater than or equal to  $1/2$  (as otherwise, we would get  $q'_{i,j} < 1/2$ ). Now, according to the hypotheses, all the components of the parameter  $\theta$  are different from each other, and therefore  $p_{i,j} \neq 1/2$ , so we deduce that it must be strictly greater than  $1/2$ .

**Lemma 6.** (Lemma 4 in the paper) *Assume the model (8),  $\theta_i \neq \theta_j$  for  $i \neq j$ , and  $\theta_i > 0$  for all  $i \in [K]$ . Let us take an arbitrarily small  $\epsilon^* > 0$ . There exists  $N_0 \in \mathbb{N}$  such that  $\theta_i > \theta_j$  if and only if  $\hat{p}_{i,j} > 1/2$  for all  $i, j \in [K]$ , with probability at least  $1 - \epsilon^*$ , after having observed at least  $N_0$  preferences.*

*Proof.* Take an arbitrary pair  $(i, j)$ , and let us consider the sequence  $(\hat{p}_{i,j}^{(n)})_{n \in \mathbb{N}}$ , where  $\hat{p}_{i,j}^{(n)} = \frac{c_{i,j}^{(n)}}{c_{i,j}^{(n)} + c_{j,i}^{(n)}}$ , and  $c_{i,j}^{(n)}$  denotes the number of times the pair  $a_i \succ a_j$  is observed in the sample. According to the Strong Law of Large Numbers, the sequence

$$\hat{p}_{i,j}^{(n)} = \frac{c_{i,j}^{(n)}/n}{c_{i,j}^{(n)}/n + c_{j,i}^{(n)}/n}$$

converges in probability to  $q'_{i,j} = \frac{q_{i,j}}{q_{i,j} + q_{j,i}}$ . This means that, for any pair of arbitrary  $\epsilon > 0$  and  $\delta > 0$ , there exists  $N_{\delta, \epsilon, i, j} \in \mathbb{N}$  such that  $|\hat{p}_{i,j}^{(n)} - q'_{i,j}| < \delta$ , with probability greater than  $1 - \epsilon$ , for every  $n \geq N_{\delta, \epsilon, i, j}$ . Now,  $\theta_i < \theta_j$  if and only if  $p_{i,j} > 0.5$ , which is equivalent to saying that  $q'_{i,j} = q_{i,j}/(q_{i,j} + q_{j,i}) > 1/2$ , according to Lemma 5. Let us now take  $\delta = \min_{i,j} |q'_{i,j} - 1/2|/2$ ,  $\epsilon = \epsilon^*/K(K-1)$ , and  $N_0 = \max_{i,j} N_{\delta, \epsilon, i, j}$ . Then, thanks to the union bound, with probability at least  $1 - \epsilon^*$ , we can assure for every  $n \geq N_0$  that  $\hat{p}_{i,j}^{(n)} > 0.5$  if and only if  $q'_{i,j} > 1/2$  for every pair  $(i, j)$ .

**Theorem 7.** (Theorem 5 in the paper) *Copeland ranking is consistent.*

*Proof.* It is a direct consequence of Lemma 6.

**Theorem 8.** (Theorem 6 in the paper) *FAS, FAS(R), and FAS(B) are consistent.*

*Proof.* Let us separately consider the three cases.

- FAS(R). Let us first notice that  $\hat{p}_{i,j} + \hat{p}_{j,i} = 1$  and therefore,

$$\arg \min_{\pi \in \mathbb{S}_k} \left( \sum_{(i,j) : \pi(i) < \pi(j)} \hat{p}_{j,i} \right) = \arg \max_{\pi \in \mathbb{S}_k} \left( \sum_{(i,j) : \pi(i) < \pi(j)} \hat{p}_{i,j} \right).$$

Now, for an arbitrary  $\pi \in \mathbb{S}_k$ , the following equality holds:

$$\sum_{(i,j) : \pi(i) < \pi(j)} \hat{p}_{j,i} = \sum_{i < j} r_{i,j}^{\pi},$$

where  $r_{i,j}^{\pi}$  is defined as follows for every  $i < j$ :

$$r_{i,j}^{\pi} = \begin{cases} \hat{p}_{i,j} & \text{if } \pi(i) < \pi(j) \\ \hat{p}_{j,i} & \text{otherwise.} \end{cases}$$

Furthermore, according to Lemmas 5 and 6, for an arbitrarily small  $\epsilon^* > 0$ , there exists  $N_0 \in \mathbb{N}$  such that  $\theta_i > \theta_j$ , or equivalently,  $q_{i,j} > q_{j,i}$ , if and only if  $\hat{p}_{i,j} > 1/2$ , for every pair  $(i, j)$  and every  $n \geq N_0$ , with probability greater than or equal to  $1 - \epsilon^*$ . Let us now consider the function  $f : \mathbb{S}_K \rightarrow \mathbb{R}$ :  $f(\pi) = \sum_{(i,j): \pi(i) < \pi(j)} s_{i,j}^\pi$ , where

$$s_{i,j}^\pi = \begin{cases} q_{i,j} & \text{if } \pi(i) < \pi(j) \\ q_{j,i} & \text{otherwise.} \end{cases}$$

The argument of the maximum of this function is  $\pi^* = \text{arg sort}\{\theta_1, \dots, \theta_k\}$ . Consequently, the solution to FAS, after having observed at least  $N_0$  preferences, coincides with  $\text{arg sort}\{\theta_1, \dots, \theta_k\}$  with probability at least  $1 - \epsilon^*$ .

- FAS. The proof is analogous to the previous case. (Let us notice that  $c_{i,j} > c_{j,i}$  if and only if  $\hat{p}_{i,j} > 1/2$ ).
- FAS(B). First of all, let us take into account that  $\mathbb{I}(\hat{p}_{j,i} > 1/2) + \mathbb{I}(\hat{p}_{i,j} > 1/2) = 1$ , for every  $(i, j)$  and therefore the FAS(B) ranking is  $\hat{\pi}$  satisfying:

$$\begin{aligned} \hat{\pi} &= \arg \max_{\pi \in \mathbb{S}_K} \sum_{(i,j): \pi(i) < \pi(j)} \mathbb{I}(\hat{p}_{i,j} > 1/2) \\ &= \arg \max_{\pi \in \mathbb{S}_K} \#\{(i, j) : \pi(i) < \pi(j) \text{ and } \hat{p}_{i,j} > 1/2\}. \end{aligned}$$

Now, let us take an arbitrarily small  $\epsilon^* > 0$ . According to Lemma 6, there exists  $N_0$  such that  $\hat{p}_{i,j} > 1/2$  if and only if  $\theta_i > \theta_j$ , for every pair  $(i, j)$  and for all  $n \geq N_0$  with probability at least  $1 - \epsilon^*$ . Therefore, with probability at least  $1 - \epsilon^*$  and for a sufficiently large sample, we can equivalently write that the solution to the FAS(B) algorithm is  $\hat{\pi}$  satisfying:

$$\begin{aligned} \hat{\pi} &= \arg \max_{\pi \in \mathbb{S}_K} \sum_{(i,j): \pi(i) < \pi(j)} \mathbb{I}(\hat{p}_{i,j} > 1/2) \\ &= \arg \max_{\pi \in \mathbb{S}_K} \#\{(i, j) : \pi(i) < \pi(j) \text{ and } \theta_i > \theta_j\}. \end{aligned}$$

Clearly, the solution to this problem is  $\pi^* = \text{arg sort}\{\theta_1, \dots, \theta_k\}$  (the mode of the underlying PL distribution).

## 2 Experimental Results

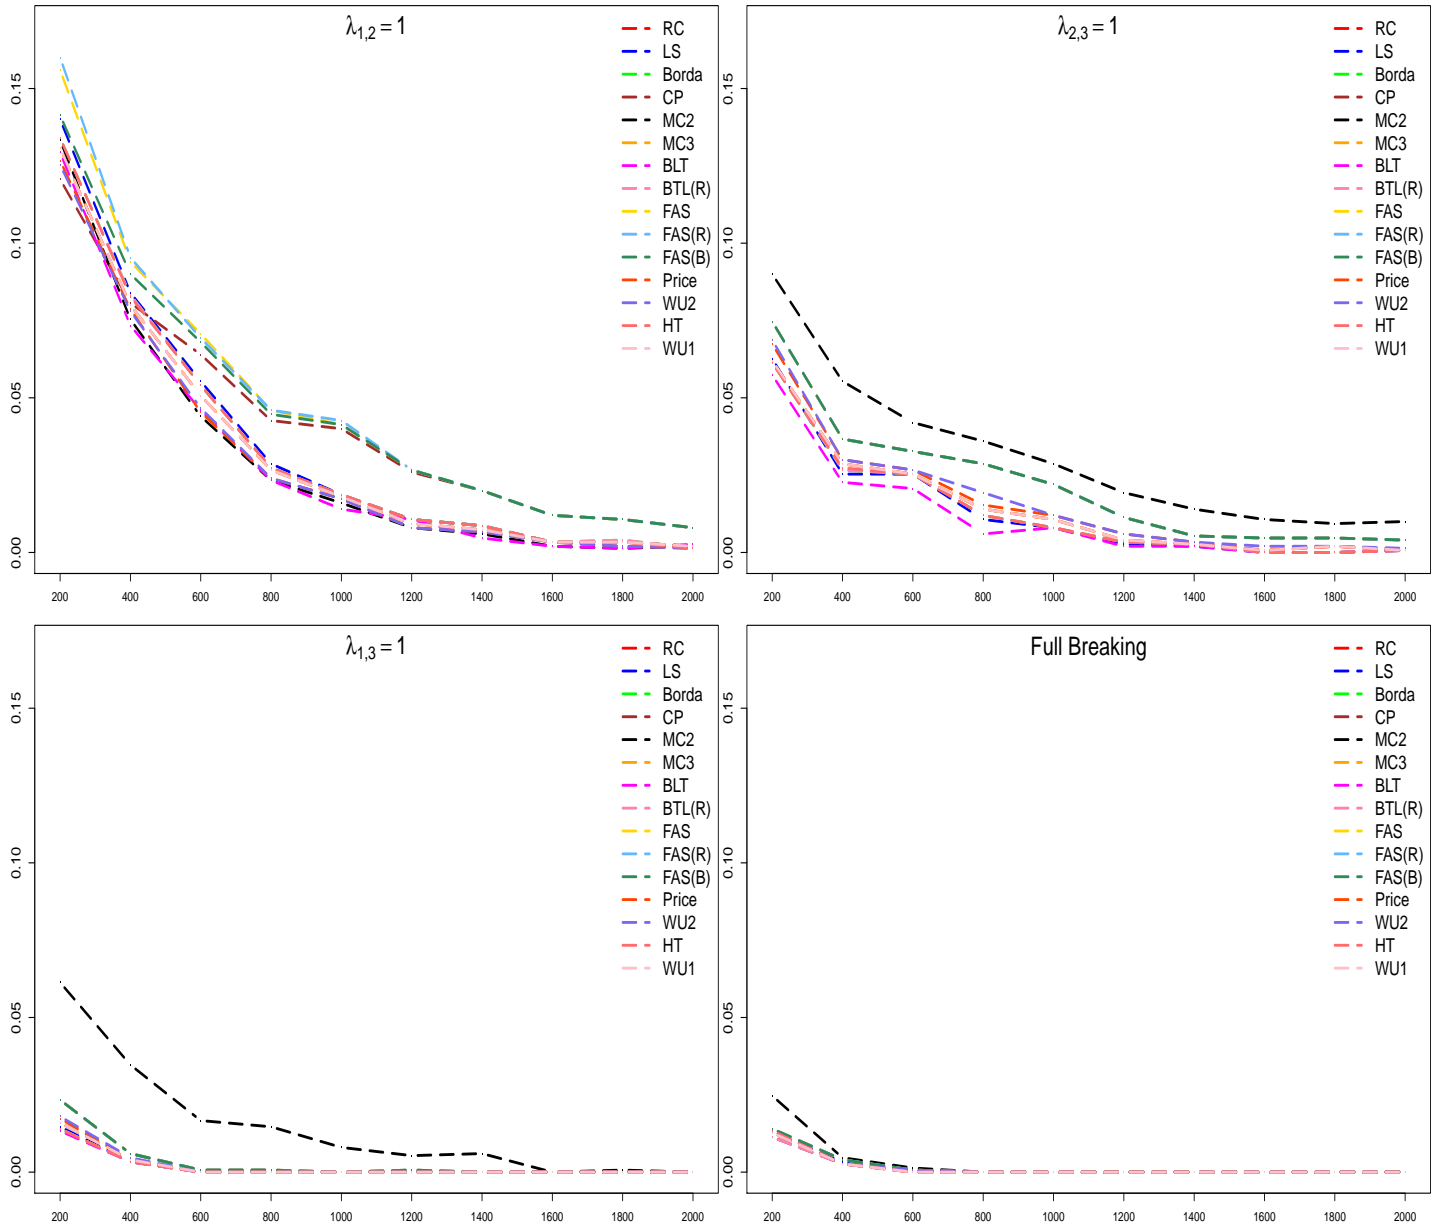

**Figure 1:** Simulation results of algorithms for coarsened rankings when full rankings are generated according to PL (with  $K = 3$ ) and coarsening is degenerate ( $\lambda_{i,j} = 1$  for some  $1 \leq i < j \leq K$ ). Full breaking (extraction of all pairwise preferences) is shown as a baseline. X-axis shows the sample size. Y-axis is the Kendall distance averaged over 500 runs.

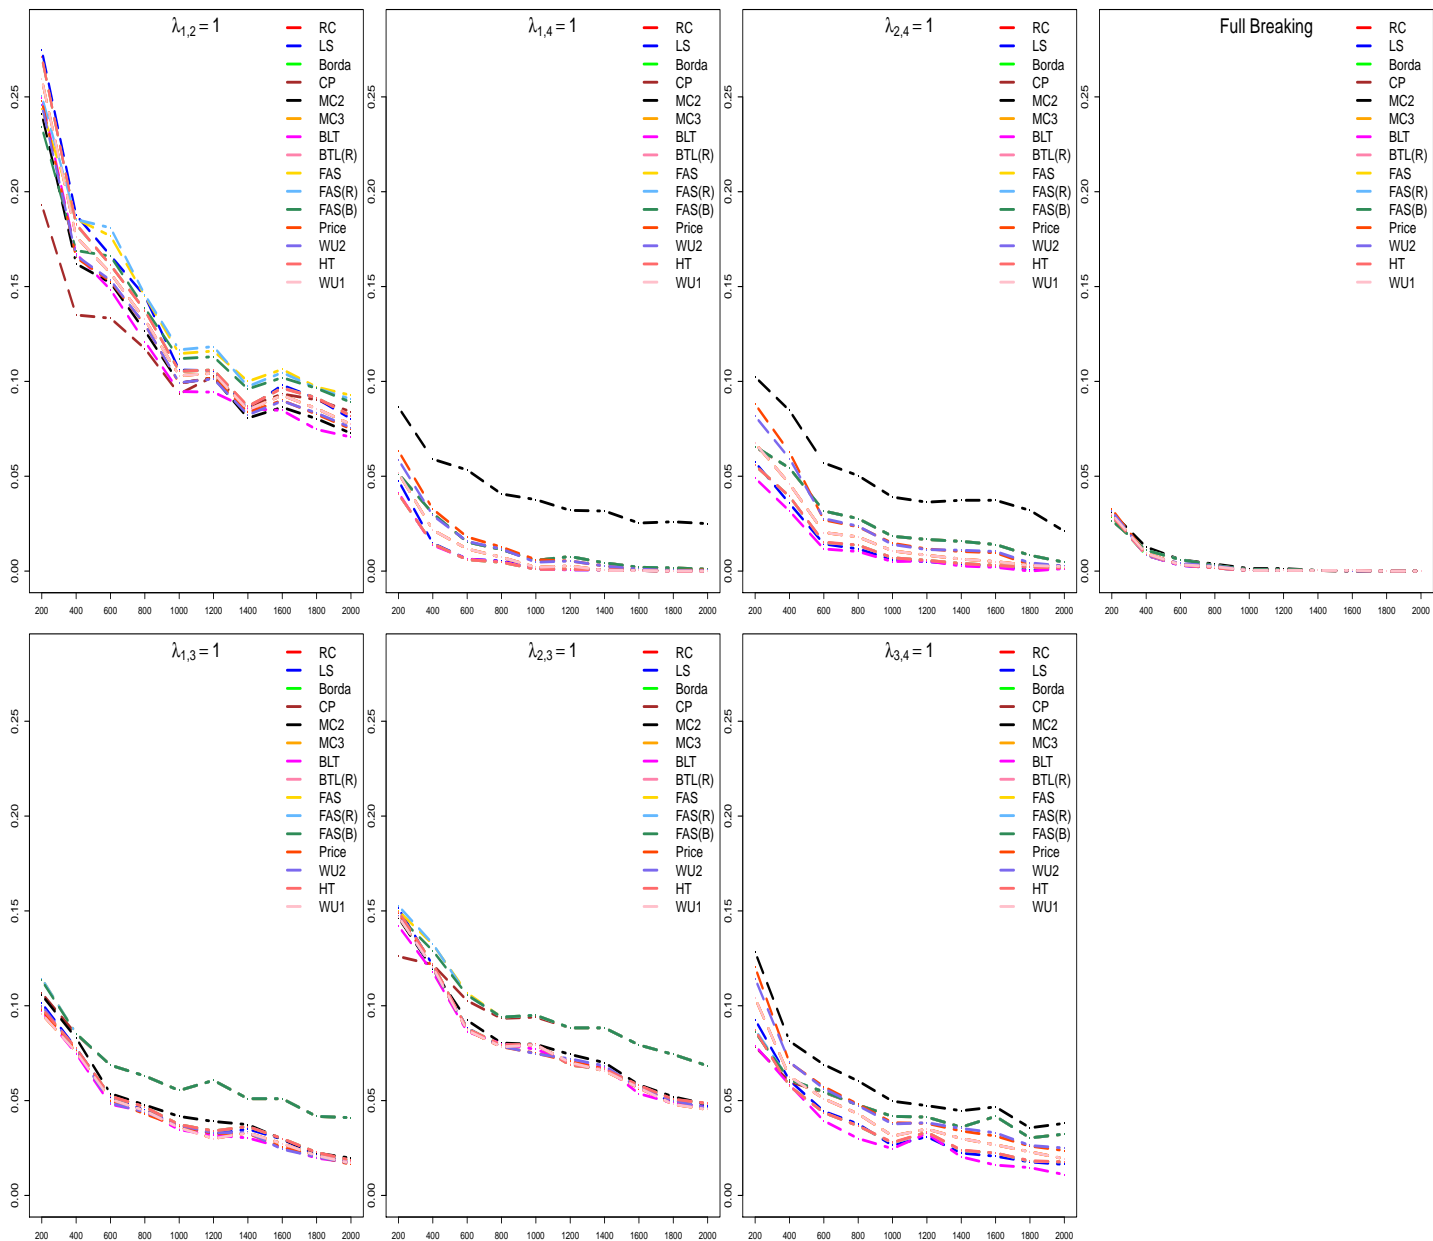

**Figure 2:** Simulation results of algorithms for coarsened rankings when full rankings are generated according to PL (with  $K = 4$ ) and coarsening is degenerate ( $\lambda_{i,j} = 1$  for some  $1 \leq i < j \leq K$ ). Full breaking (extraction of all pairwise preferences) is shown as a baseline. X-axis shows the sample size. Y-axis is the Kendall distance averaged over 500 runs.

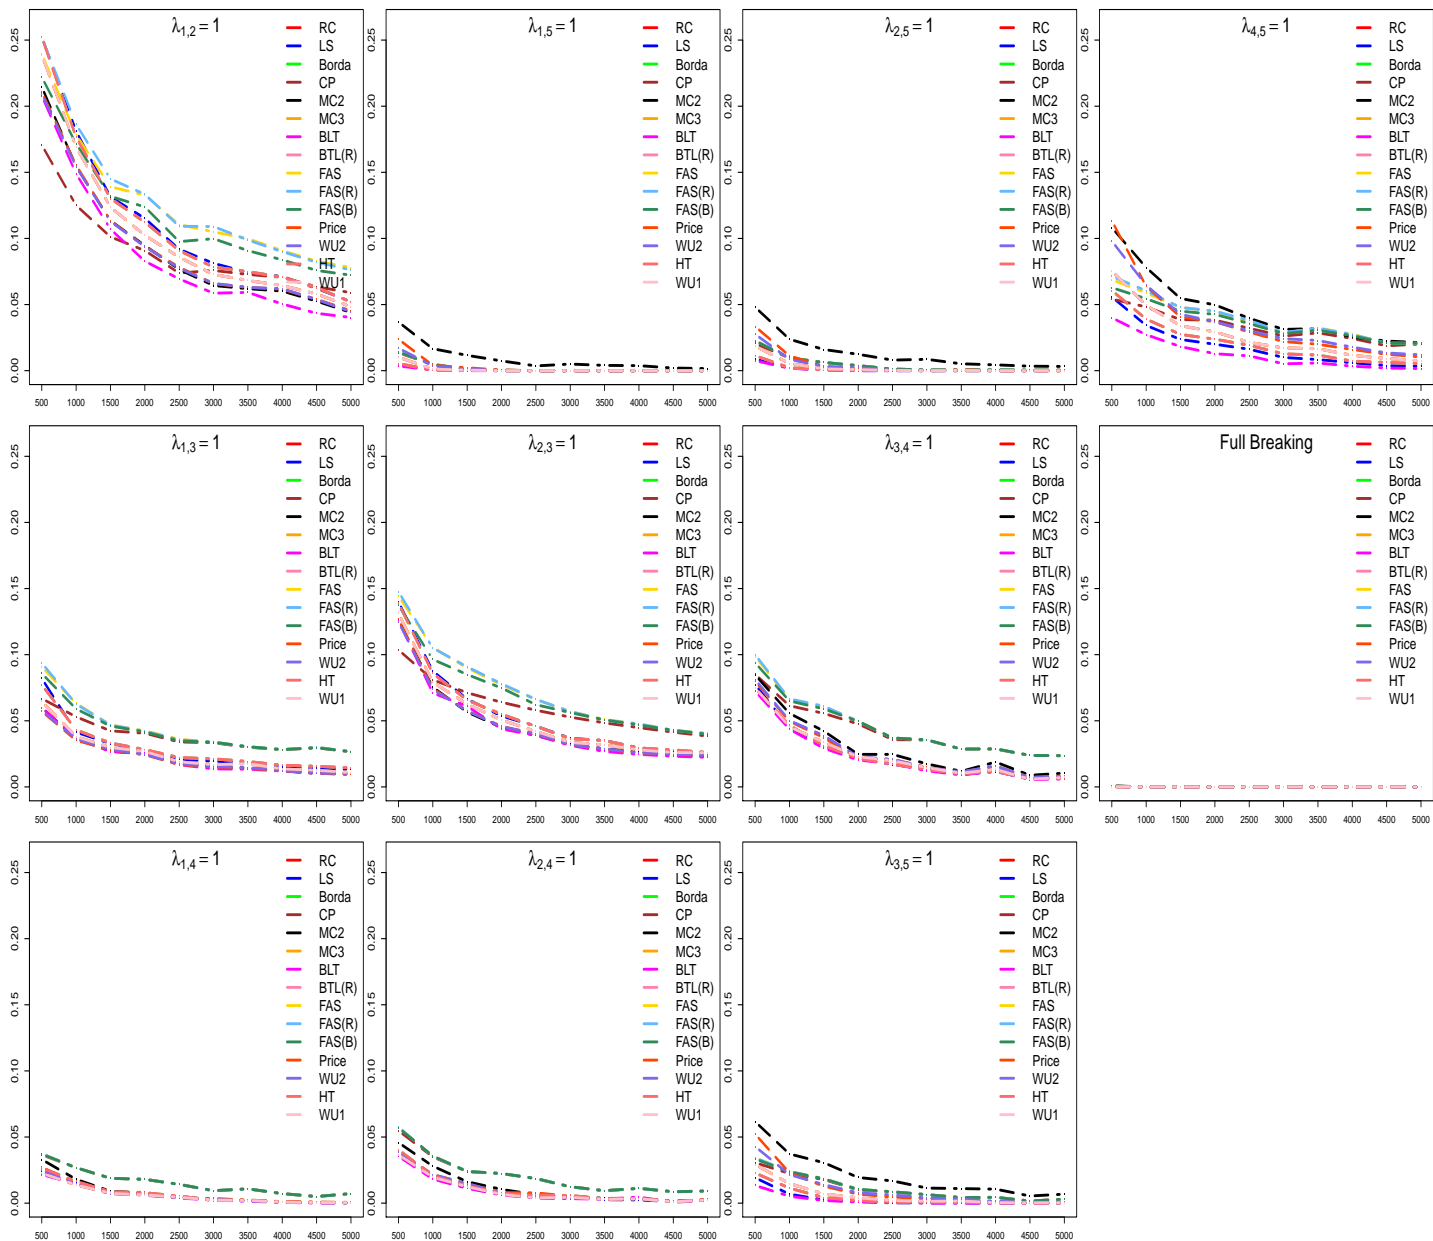

**Figure 3:** Simulation results of algorithms for coarsened rankings when full rankings are generated according to PL (with  $K = 5$ ) and coarsening is degenerate ( $\lambda_{i,j} = 1$  for some  $1 \leq i < j \leq K$ ). Full breaking (extraction of all pairwise preferences) is shown as a baseline. X-axis shows the sample size. Y-axis is the Kendall distance averaged over 500 runs.



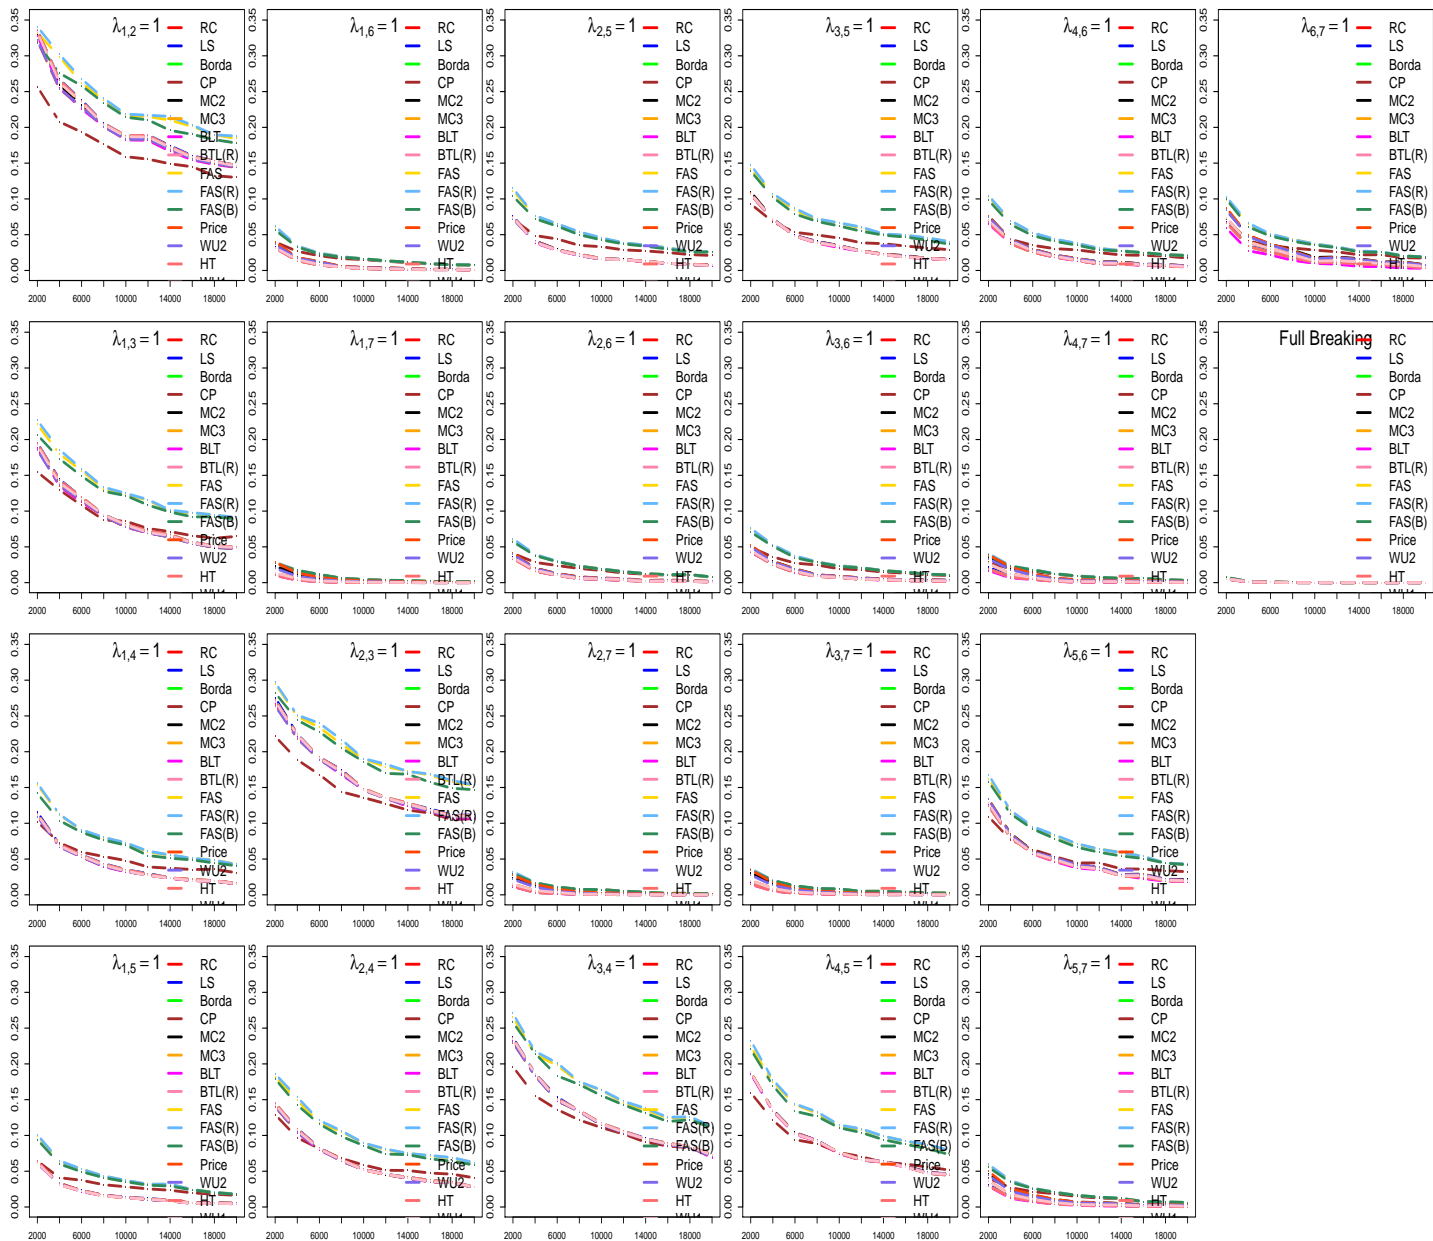

**Figure 4:** Simulation results of algorithms for coarsened rankings when full rankings are generated according to PL (with  $K = 7$ ) and coarsening is degenerate ( $\lambda_{i,j} = 1$  for some  $1 \leq i < j \leq K$ ). Full breaking (extraction of all pairwise preferences) is shown as a baseline. X-axis shows the sample size. Y-axis is the Kendall distance averaged over 500 runs.

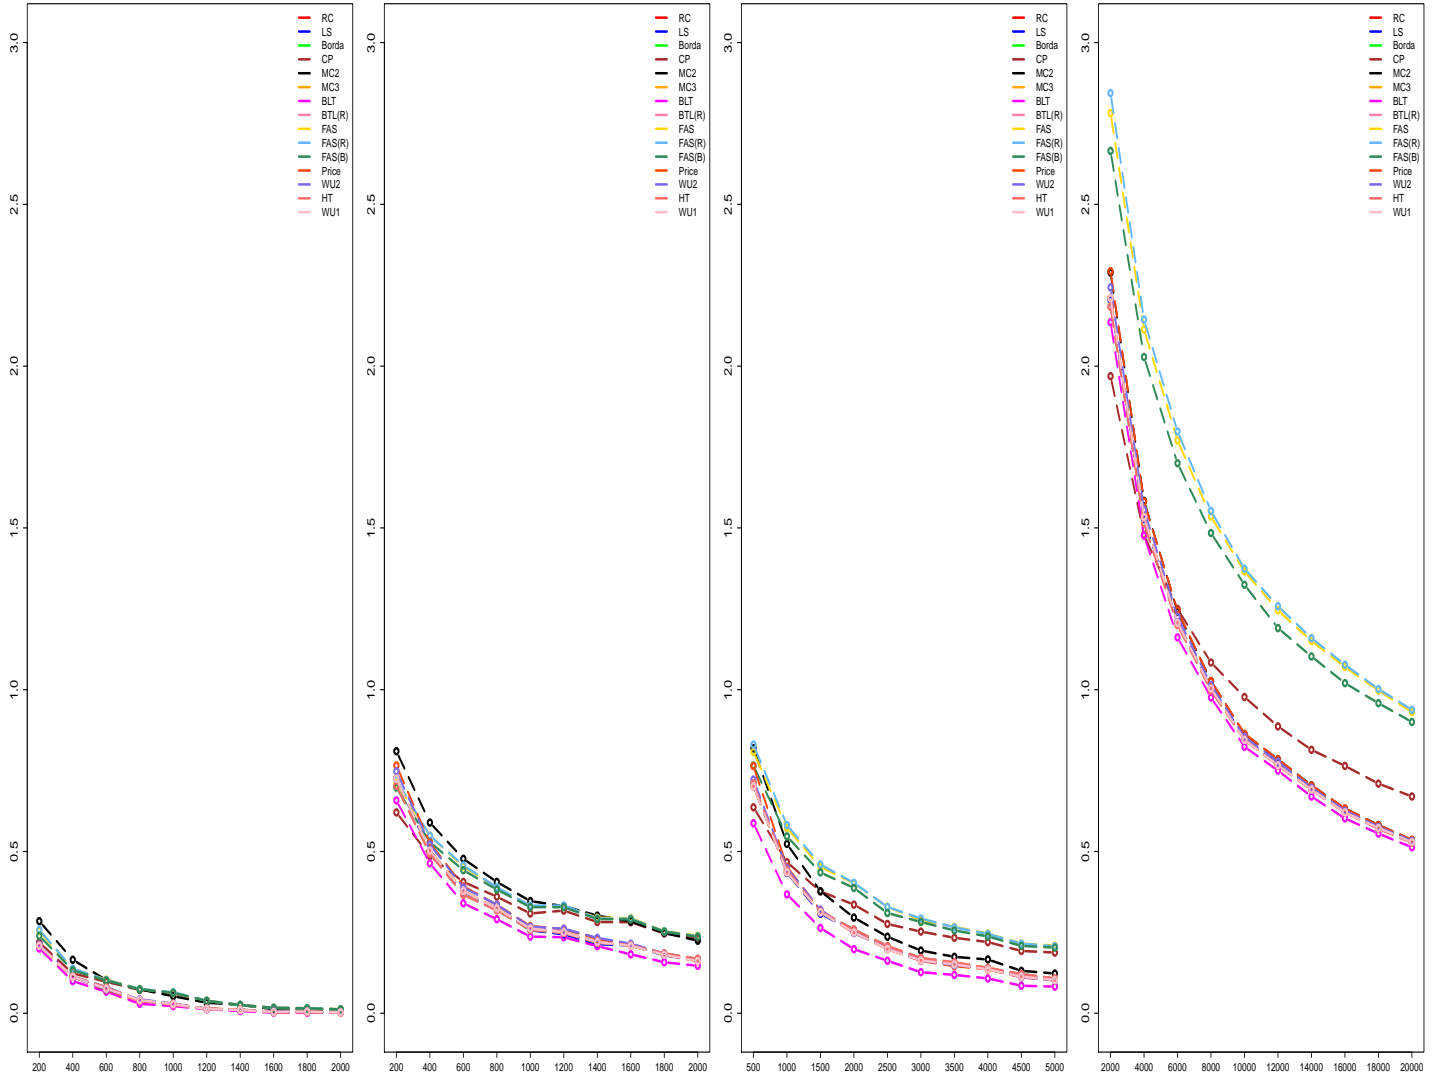

**Figure 5:** Performance of algorithms averaged over all coarsening positions  $(i, j)$  when rankings are generated according to PL. Each plot from left to right corresponds to the number of items  $K \in \{3, 4, 5, 7\}$ , respectively. X-axis is the sample size. Y-axis shows the Kendall distance.

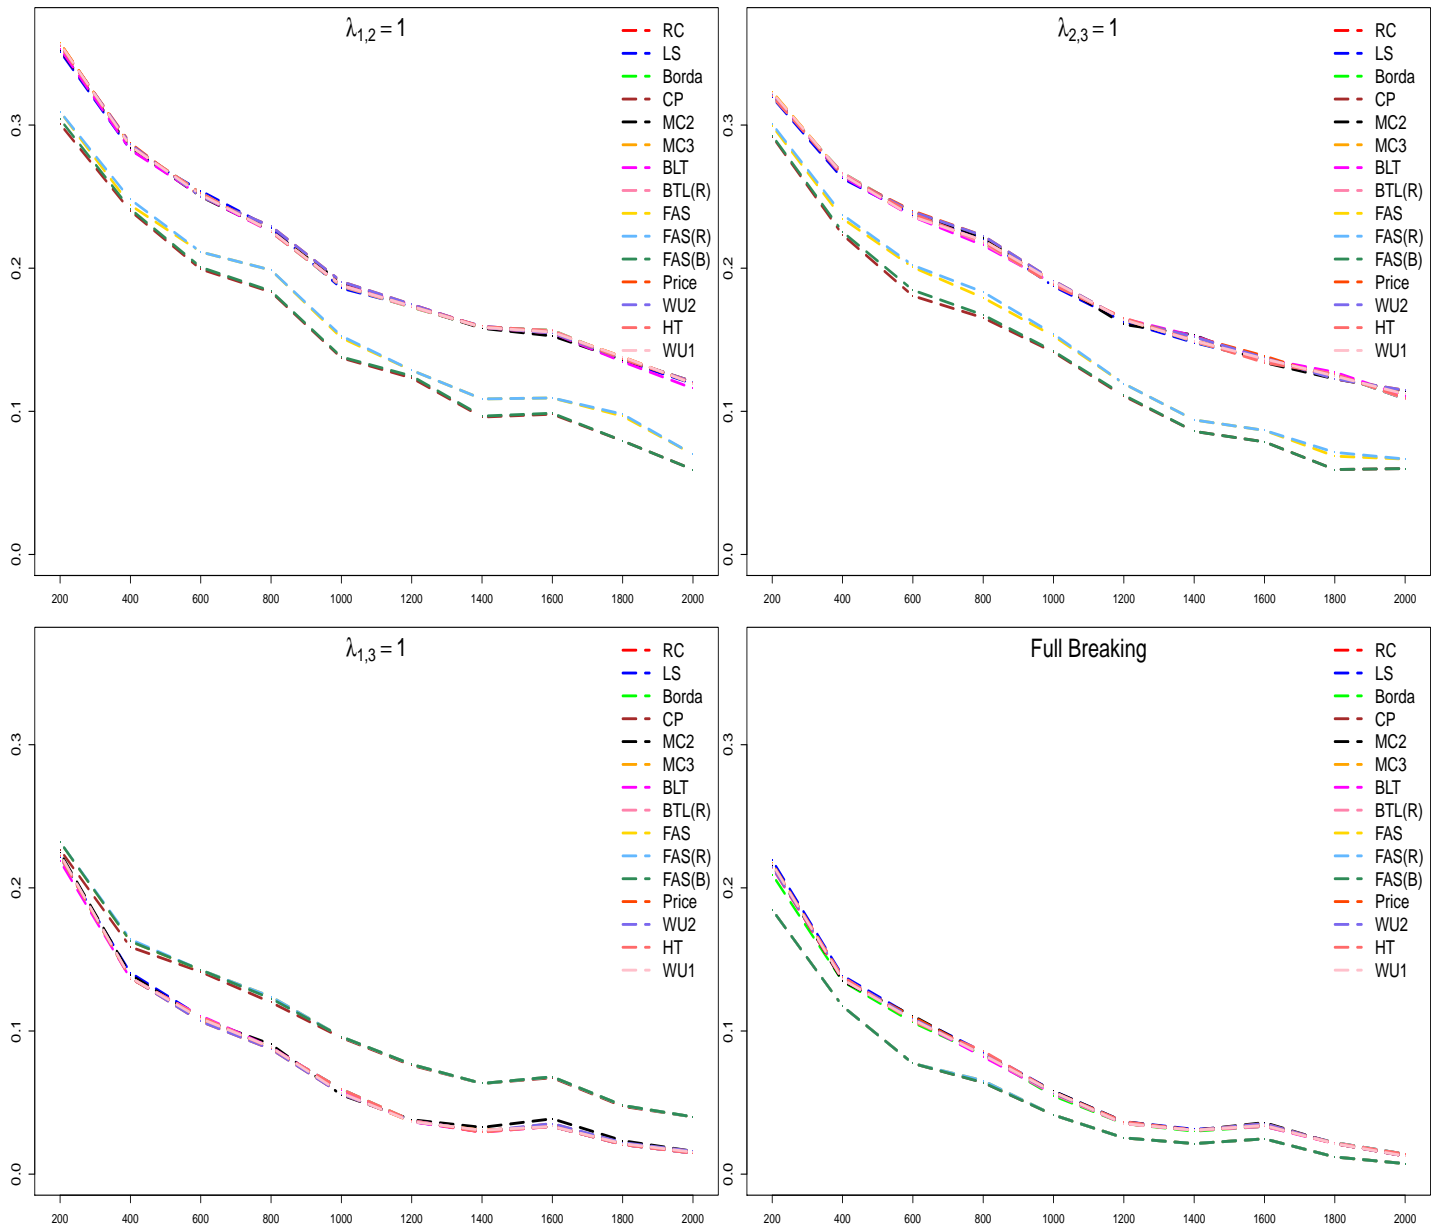

**Figure 6:** Simulation results of algorithms for coarsened rankings when full rankings are generated according to Mallows (with  $K = 3$  and dispersion  $\phi = 0.1$ ), and coarsening is degenerate ( $\lambda_{i,j} = 1$  for some  $1 \leq i < j \leq K$ ). Full breaking (extraction of all pairwise preferences) is shown as a baseline. X-axis shows the sample size. Y-axis is the Kendall distance averaged over 500 runs.

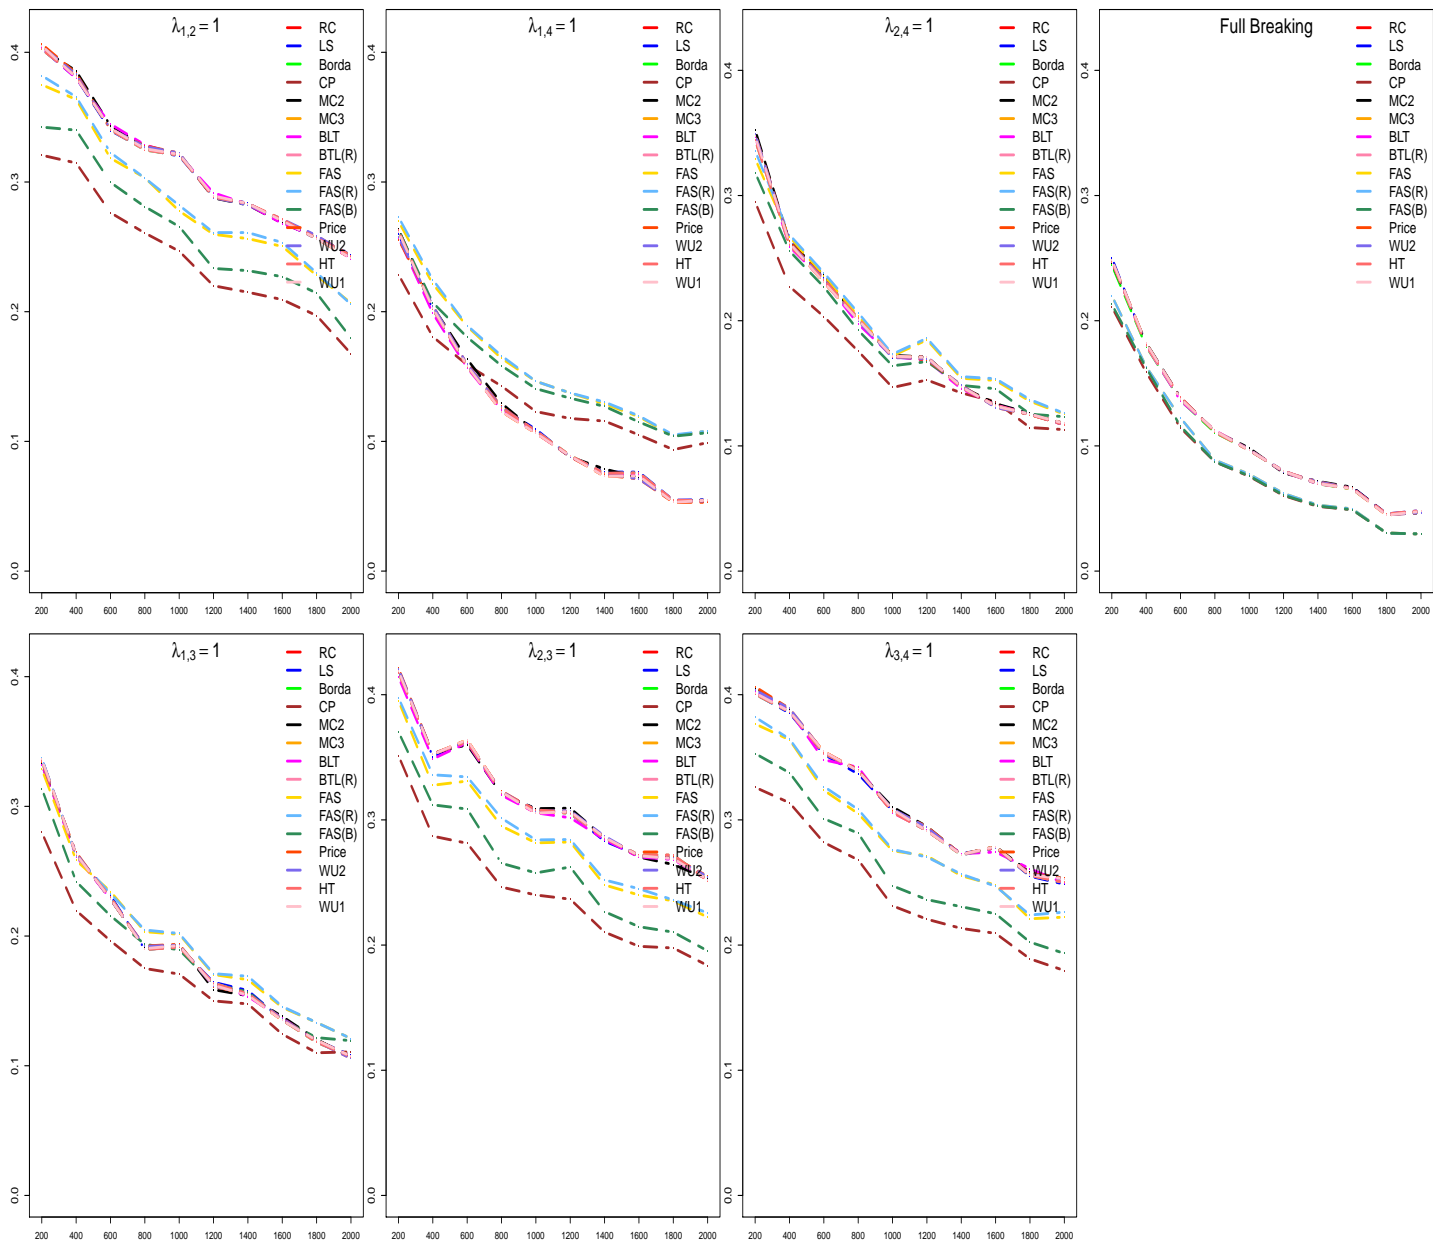

**Figure 7:** Simulation results of algorithms for coarsened rankings when full rankings are generated according to Mallows (with  $K = 4$  and dispersion  $\phi = 0.1$ ), and coarsening is degenerate ( $\lambda_{i,j} = 1$  for some  $1 \leq i < j \leq K$ ). Full breaking (extraction of all pairwise preferences) is shown as a baseline. X-axis shows the sample size. Y-axis is the Kendall distance averaged over 500 runs.

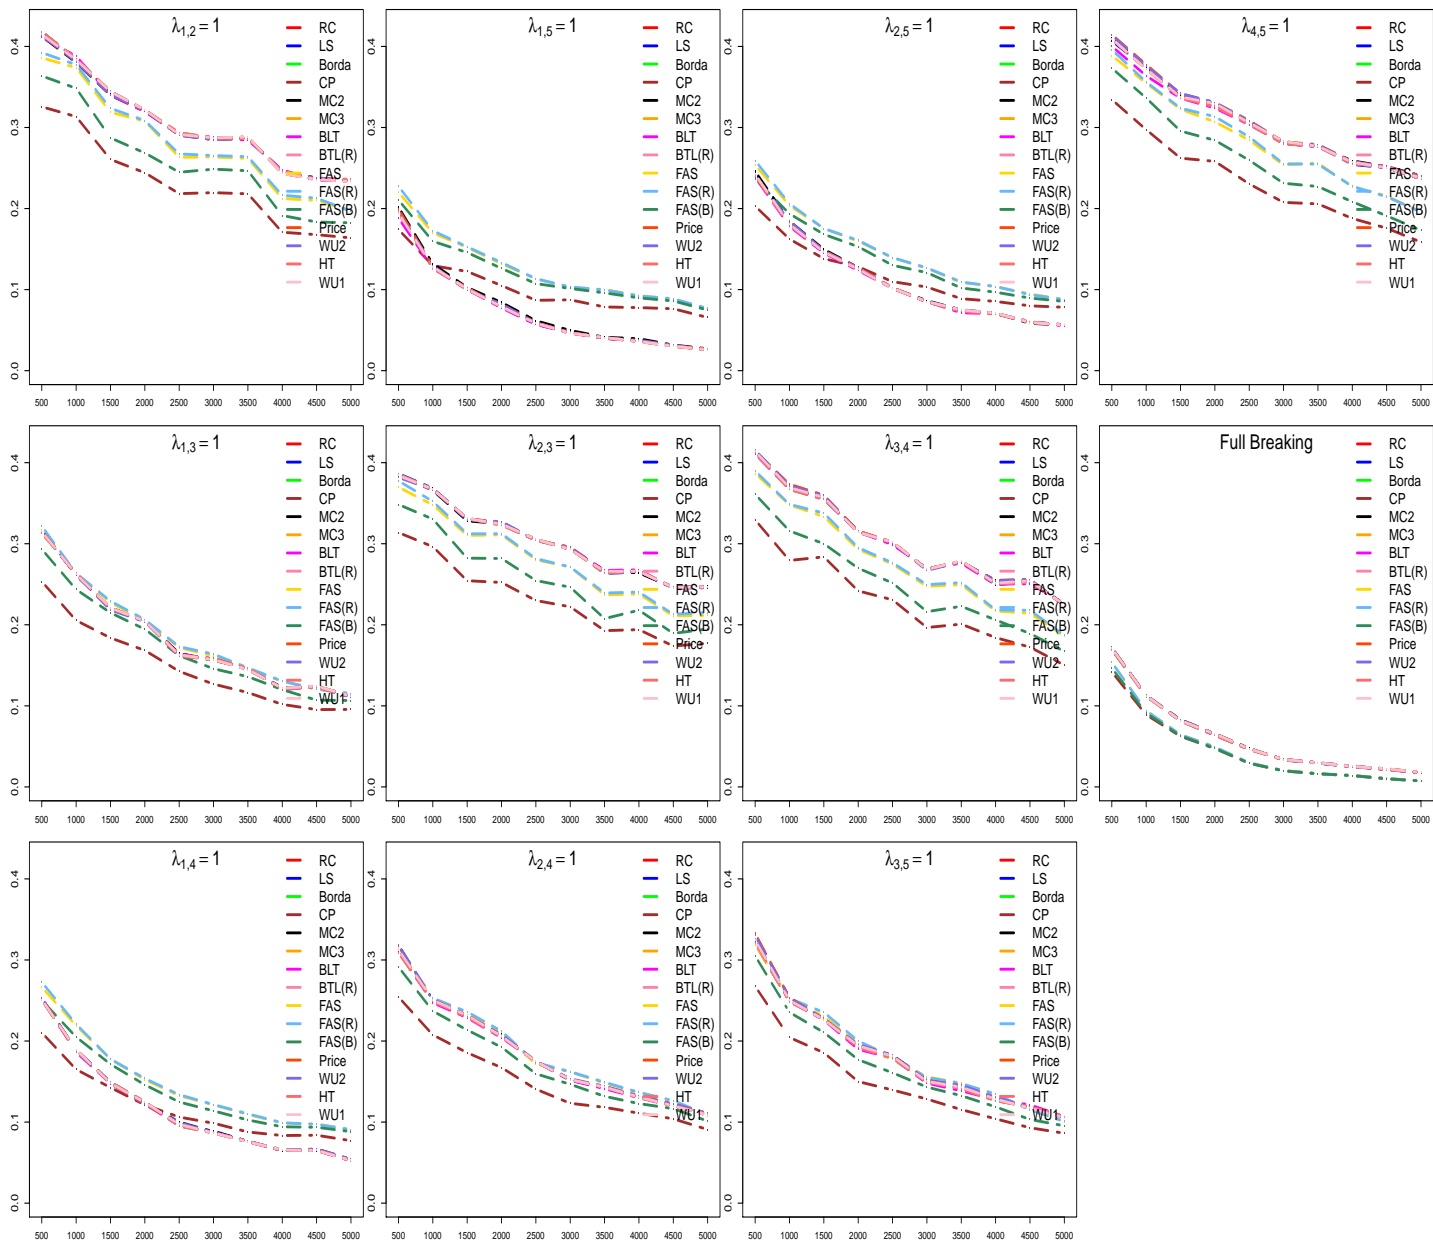

**Figure 8:** Simulation results of algorithms for coarsened rankings when full rankings are generated according to Mallows (with  $K = 5$  and dispersion  $\phi = 0.1$ ), and coarsening is degenerate ( $\lambda_{i,j} = 1$  for some  $1 \leq i < j \leq K$ ). Full breaking (extraction of all pairwise preferences) is shown as a baseline. X-axis shows the sample size. Y-axis is the Kendall distance averaged over 500 runs.

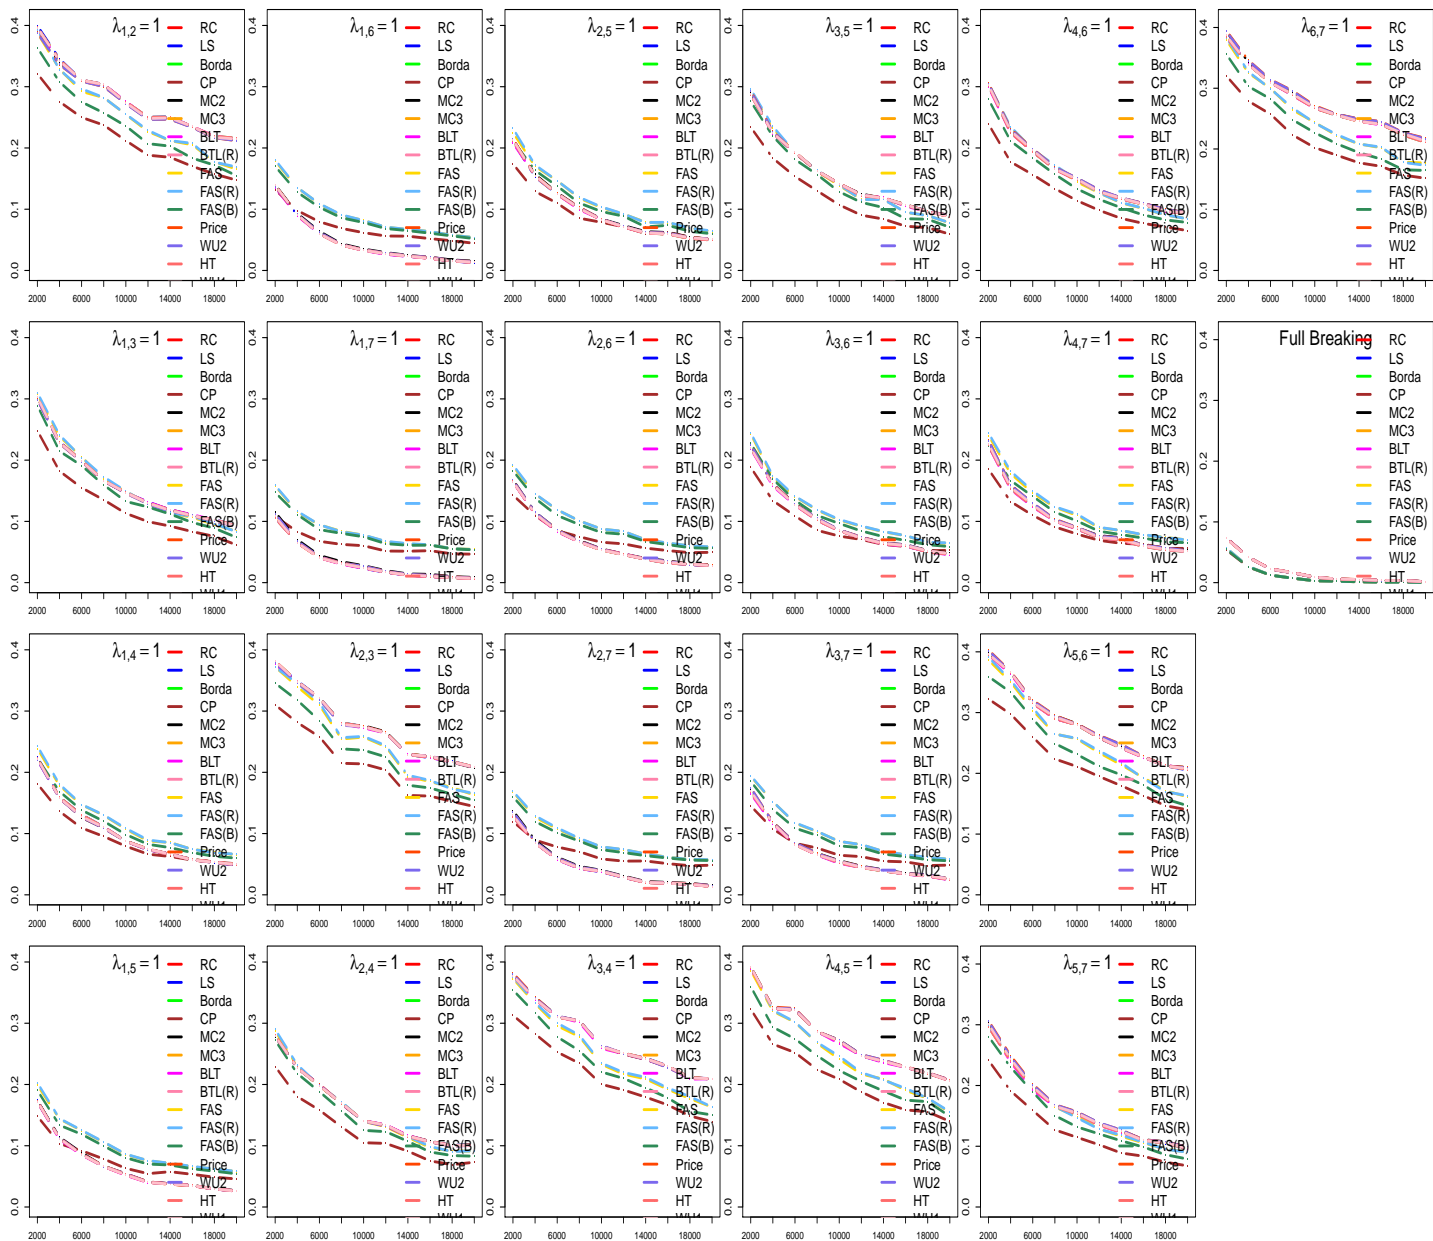

**Figure 9:** Simulation results of algorithms for coarsened rankings when full rankings are generated according to Mallows (with  $K = 7$  and dispersion  $\phi = 0.1$ ), and coarsening is degenerate ( $\lambda_{i,j} = 1$  for some  $1 \leq i < j \leq K$ ). Full breaking (extraction of all pairwise preferences) is shown as a baseline. X-axis shows the sample size. Y-axis is the Kendall distance averaged over 500 runs.

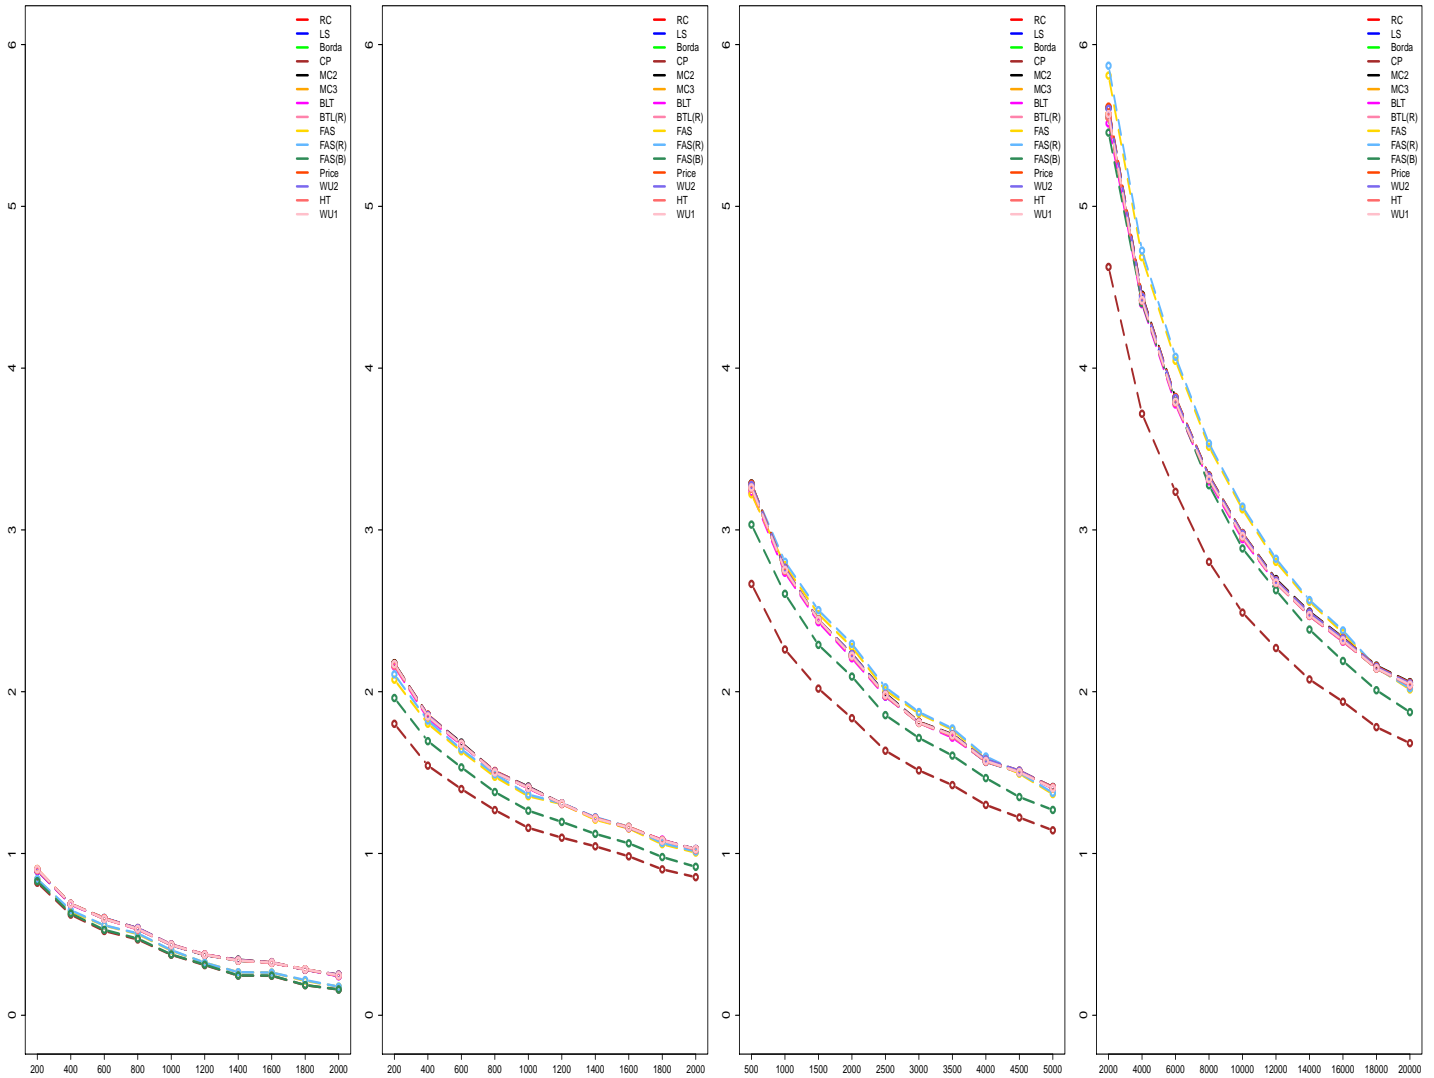

**Figure 10:** Performance of algorithms averaged over all coarsening positions  $(i, j)$  when rankings are generated according to Mallows with dispersion  $\phi = 0.1$ . Each plot from left to right corresponds to the number of items  $K \in \{3, 4, 5, 7\}$ , respectively. X-axis is the sample size. Y-axis shows the Kendall distance.

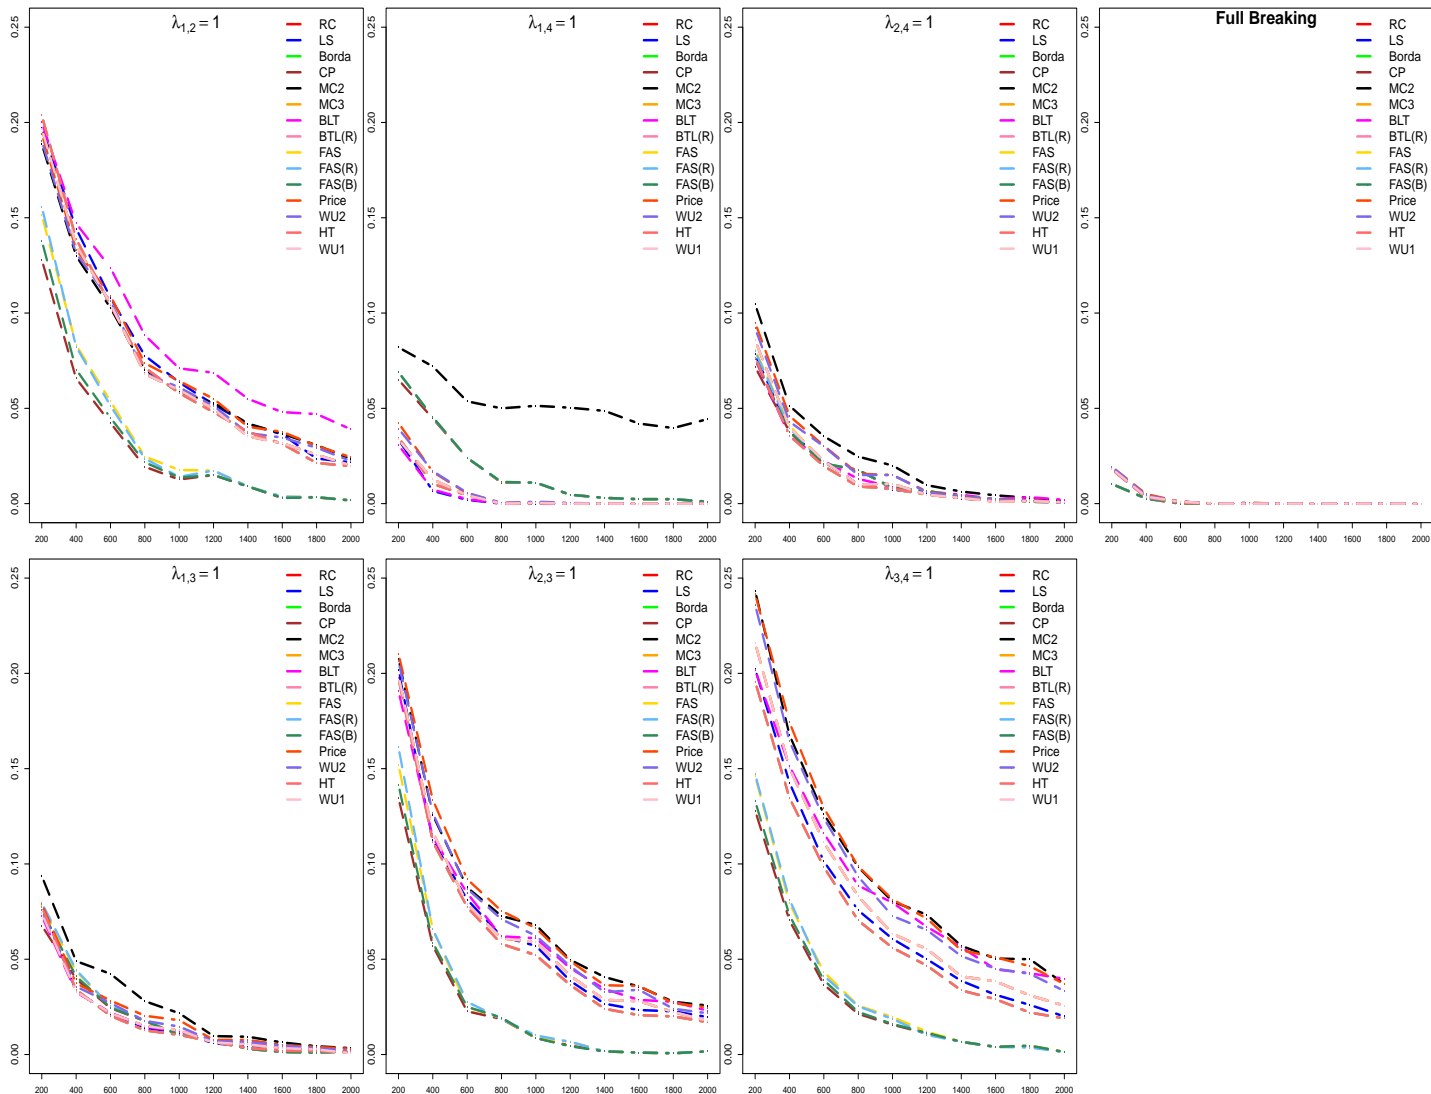

**Figure 11:** Simulation results of algorithms for coarsened rankings when full rankings are generated according to Mallows (with  $K = 4$  and dispersion  $\phi = 0.5$ ), and coarsening is degenerate ( $\lambda_{i,j} = 1$  for some  $1 \leq i < j \leq K$ ). Full breaking (extraction of all pairwise preferences) is shown as a baseline. X-axis shows the sample size. Y-axis is the Kendall distance averaged over 500 runs.



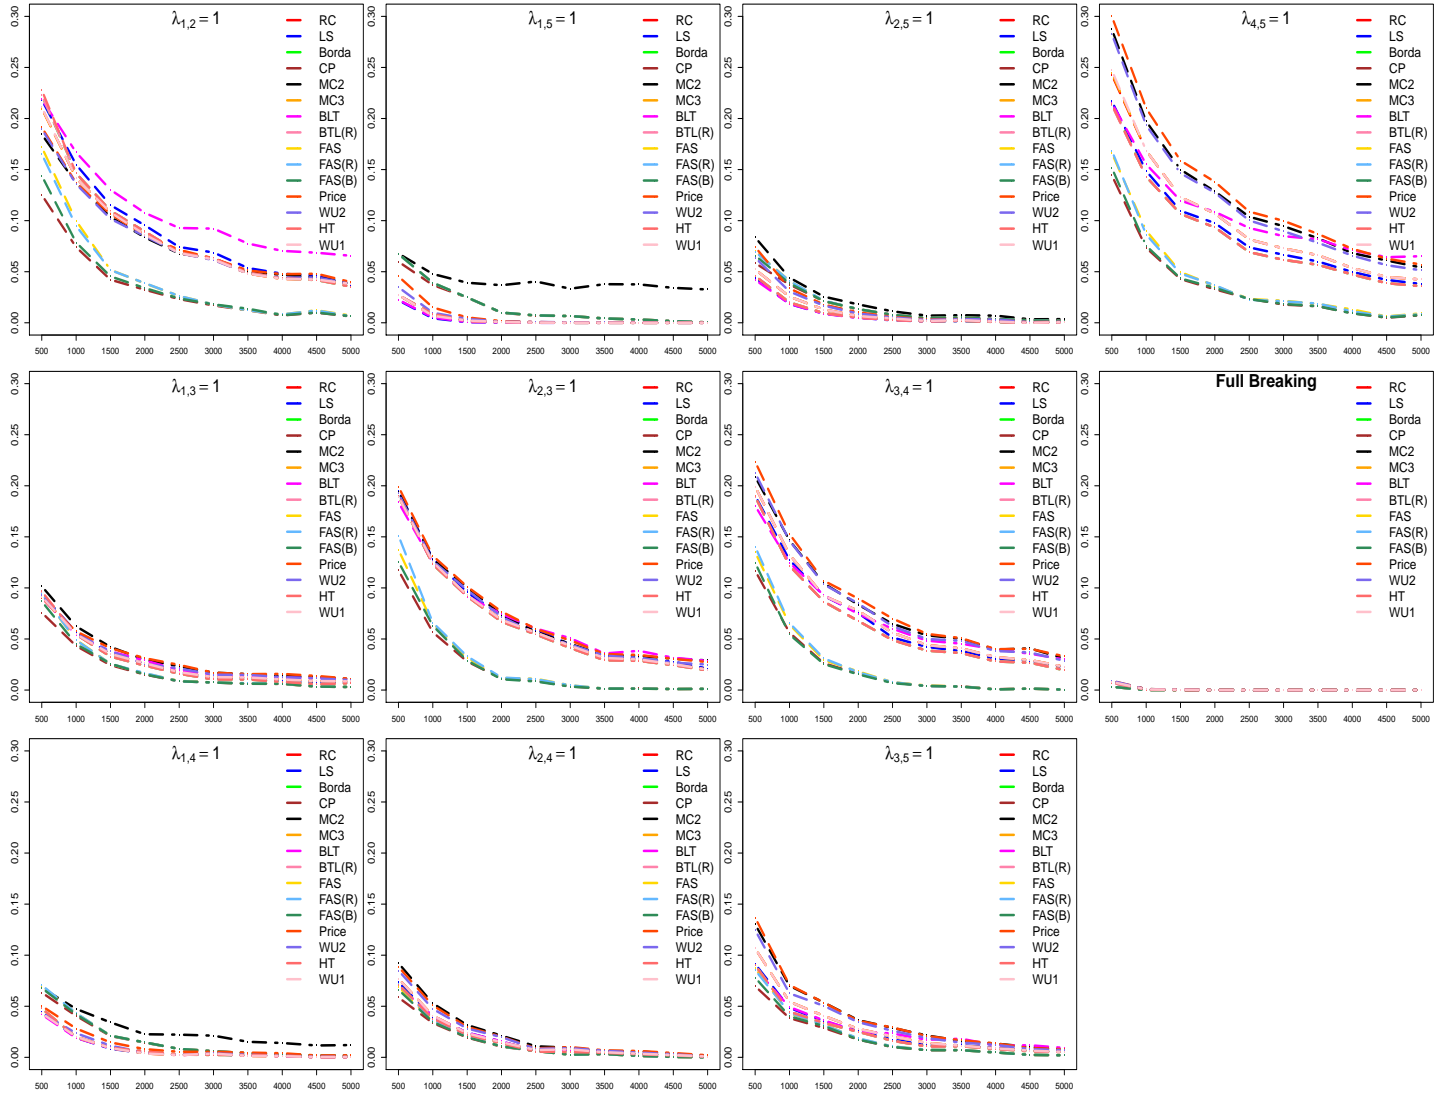

**Figure 12:** Simulation results of algorithms for coarsened rankings when full rankings are generated according to Mallows (with  $K = 5$  and dispersion  $\phi = 0.5$ ), and coarsening is degenerate ( $\lambda_{i,j} = 1$  for some  $1 \leq i < j \leq K$ ). Full breaking (extraction of all pairwise preferences) is shown as a baseline. X-axis shows the sample size. Y-axis is the Kendall distance averaged over 500 runs.
